## Inhibition of Presynaptic Sodium Channels by Halothane

Lingamaneni Ratnakumari, Ph.D.,\* Hugh C. Hemmings, Jr., M.D., Ph.D.†

**Background:** Recent electrophysiologic studies indicate that clinical concentrations of volatile general anesthetic agents inhibit central nervous system sodium ( $\text{Na}^+$ ) channels. In this study, the biochemical effects of halothane on  $\text{Na}^+$  channel function were determined using rat brain synaptosomes (pinched-off nerve terminals) to assess the role of presynaptic  $\text{Na}^+$  channels in anesthetic effects.

**Methods:** Synaptosomes from adult rat cerebral cortex were used to determine the effects of halothane on veratridine-evoked  $\text{Na}^+$  channel-dependent  $\text{Na}^+$  influx (using  $^{22}\text{Na}^+$ ), changes in intrasynaptosomal  $[\text{Na}^+]$  (using ion-specific spectrofluorometry), and neurotoxin interactions with specific receptor sites of the  $\text{Na}^+$  channel (by radioligand binding). The potential physiologic and functional significance of these effects was determined by measuring the effects of halothane on veratridine-evoked  $\text{Na}^+$  channel-dependent glutamate release (using enzyme-coupled spectrofluorometry).

**Results:** Halothane inhibited veratridine-evoked  $^{22}\text{Na}^+$  influx ( $\text{IC}_{50} = 1.1 \text{ mM}$ ) and changes in intrasynaptosomal  $[\text{Na}^+]$  (concentration for 50% inhibition  $[\text{IC}_{50}] = 0.97 \text{ mM}$ ), and it specifically antagonized [ $^3\text{H}$ ]batrachotoxinin-A 20- $\alpha$ -benzoate binding to receptor site two of the  $\text{Na}^+$  channel ( $\text{IC}_{50} = 0.53 \text{ mM}$ ). Scatchard and kinetic analysis revealed an allosteric competitive mechanism for inhibition of toxin binding. Halothane inhibited veratridine-evoked glutamate release from synaptosomes with comparable potency ( $\text{IC}_{50} = 0.67 \text{ mM}$ ).

**Conclusions:** Halothane significantly inhibited  $\text{Na}^+$  channel-mediated  $\text{Na}^+$  influx, increases in intrasynaptosomal  $[\text{Na}^+]$  and glutamate release, and competed with neurotoxin binding to site two of the  $\text{Na}^+$  channel in synaptosomes at concentrations within its clinical range (minimum alveolar concentration, 1–

2). These findings support a role for presynaptic  $\text{Na}^+$  channels as a molecular target for general anesthetic effects. (Key words: Batrachotoxinin-A 20- $\alpha$ -benzoate; brevetoxin-B; exocytosis; glutamate; volatile anesthetics.)

NEUROTRANSMISSION consists of action potential propagation along axons and chemical transmission across synapses, both of which involve voltage-dependent sodium channels ( $\text{Na}^+$  channels).<sup>1,2</sup> Previous studies in mammalian and nonmammalian tissues have demonstrated inhibition of neuronal  $\text{Na}^+$  channels by volatile anesthetic agents, including reduced axonal conduction,<sup>3,4</sup> increased firing threshold,<sup>5,6</sup> and altered  $\text{Na}^+$  channel gating and conductance.<sup>7,8</sup> Recent evidence supports inhibition of central nervous system (CNS)  $\text{Na}^+$  channels at clinical concentrations in cells transfected with rat brain type IIA  $\text{Na}^+$  channels.<sup>9</sup> Voltage- and use-dependent suppression of  $\text{Na}^+$  channel currents was found at physiologic resting membrane potentials, which provides direct evidence that  $\text{Na}^+$  channels are a sensitive molecular target for volatile anesthetic action.

Volatile anesthetic agents also inhibit release of neurotransmitters in the CNS.<sup>3,10–14</sup> Possible mechanisms include effects on presynaptic terminal depolarization;  $\text{Ca}^{2+}$  influx; and synthesis, storage, exocytosis, and inactivation of neurotransmitters. Invading action potentials depolarize the presynaptic plasma membrane by activation of  $\text{Na}^+$  channels, which leads to  $\text{Ca}^{2+}$  entry through activation of voltage-dependent  $\text{Ca}^{2+}$  channels, followed by  $\text{Ca}^{2+}$ -dependent exocytotic release of neurotransmitters.<sup>2</sup> Inhibition of neuronal  $\text{Ca}^{2+}$  channels by volatile anesthetic agents has been demonstrated by effects on intracellular  $[\text{Ca}^{2+}]$ ,<sup>15,16</sup> radioligand binding,<sup>17,18</sup> and  $\text{Ca}^{2+}$  currents.<sup>19</sup> Data from our laboratory, however, suggest that a step proximal to  $\text{Ca}^{2+}$  influx, *i.e.*,  $\text{Na}^+$  influx through  $\text{Na}^+$  channels, is more sensitive than  $\text{Ca}^{2+}$  influx through  $\text{Ca}^{2+}$  channels to the presynaptic actions of volatile anesthetic agents,<sup>12</sup> although this is controversial.<sup>11</sup> Peripheral neuronal  $\text{Na}^+$  channels also appear to be more sensitive than  $\text{Ca}^{2+}$  channels to the action of isoflurane.<sup>20</sup>

\* Postdoctoral Fellow, Department of Anesthesiology.

† Associate Professor; Director of Research, Departments of Anesthesiology and Pharmacology.

Received from the Departments of Anesthesiology and Pharmacology, Cornell University Medical College, New York, New York. Submitted for publication July 29, 1997. Accepted for publication December 3, 1997. Supported in part by a Cornell Scholar Award in Biomedical Science and by grant GM 52441 from the National Institutes of Health to Hugh C. Hemmings Jr. Presented in part at the 26th Annual Meeting of the Society for Neuroscience, Washington, D.C., November 16–21, 1996.

Address reprint requests to Dr. Hemmings: Box 50, LC—203A, Department of Anesthesiology, Cornell University Medical College, 525 East 68th Street, New York, New York 10021. Address electronic mail to: hchemmi@mail.med.cornell.edu



In the current study, we analyzed the effects of the volatile anesthetic agent halothane on presynaptic CNS  $\text{Na}^+$  channels by measuring its effects on veratridine-evoked  $^{22}\text{Na}^+$  influx and increases in intrasynaptosomal  $[\text{Na}^+]_i$  and on the binding of radiolabeled neurotoxins to  $\text{Na}^+$  channels in rat cerebrocortical synaptosomes. We also examined the functional effects of halothane on presynaptic  $\text{Na}^+$  channels by measuring veratridine-evoked release of glutamate, the major excitatory neurotransmitter in the CNS, from the same preparation. Synaptosomes, a subcellular fraction that consists of pinched-off nerve terminals, provide a useful system for analyzing the biochemical pharmacologic characteristics of presynaptic  $\text{Na}^+$  channels.<sup>21-24</sup> Our results indicate an interaction between halothane and CNS  $\text{Na}^+$  channels and that presynaptic  $\text{Na}^+$  channels may mediate some of the inhibitory effects of volatile anesthetic agents on excitatory synaptic transmission.

## Materials and Methods

### Materials

Reagents were obtained from the following sources: [ $^{11}\text{H}$ ]saxitoxin ( $28 \text{ Ci} \cdot \text{mmol}^{-1}$ ) from Amersham (Arlington Heights, IL); [ $^3\text{H}$ ]batrachotoxinin-A 20- $\alpha$ -benzoate (BTX-B;  $34 \text{ Ci} \cdot \text{mmol}^{-1}$ ) and  $^{22}\text{NaCl}$  ( $1 \text{ mCi} \cdot \text{ml}^{-1}$ ) from DuPont-New England Nuclear (Boston, MA); [ $^{42}\text{H}$ ] brevetoxin-3 ( $14.25 \text{ Ci} \cdot \text{mmol}^{-1}$ ) and *Ptychodiscus brevis* toxin-3 (PbTx-3) from Chiral Corp. (Miami, FL); Percoll density gradient medium from Pharmacia/LKB (Uppsala, Sweden); halothane (thymol-free) from Halocarbon Products (North Augusta, SC); tetrodotoxin, veratridine, scorpion venom (*Leiurus quinquestriatus*), L-glutamate dehydrogenase (*Proteus* sp), and dimethylsulfoxide from Sigma Chemical Co. (St. Louis, MO); and the cell permeant acetoxymethyl ester precursor form of  $\text{Na}^+$ -binding benzofuran isophthalate (SBFI-AM) and Pluronic F-127 from Molecular Probes, Inc. (Eugene, OR). All other chemicals were of reagent grade.

Dimethylsulfoxide at a final concentration of 0.05% (vol/vol) was used as a vehicle in binding and flux studies to minimize reaction volumes. Control experiments showed that the vehicle alone had no effect on the variables measured (data not shown).

### Preparation of Synaptosomes

Synaptosomes from rat cerebral cortex were prepared using a modification of the procedure of Dunkley *et al.*<sup>25</sup> Adult male (150–175 g) Sprague-Dawley rats were

anesthetized with 80%  $\text{CO}_2$ /20%  $\text{O}_2$ , were killed by decapitation, and their brains were immediately removed and rinsed in ice-cold 0.32 M sucrose. Cortical gray matter was dissected and homogenized in ten volumes of 0.32 M sucrose using a motor-driven Teflon glass homogenizer at 900 rpm for 10 up-and-down strokes. The homogenate was centrifuged at  $1,000 \times g$  for 2 min. The supernatant was collected and centrifuged at  $15,000 \times g$  for 12 min. The resulting pellet was resuspended in 8 ml of 0.32 M sucrose. Aliquots (2 ml) of this fraction were loaded onto discontinuous gradients consisting of three 2.5-ml layers of filtered ( $0.45 \mu\text{m}$ ) Percoll density gradient medium (23%, 10%, and 3%) in 0.32 M sucrose plus 0.25 mM dithiothreitol and 1 mM ethylenediaminetetraacetic acid, pH 7.4. The gradients were centrifuged at  $25,000 \times g$  for 6.5 min. The synaptosome fraction was collected from the 23%/10% Percoll interface and diluted approximately fivefold in low  $\text{Na}^+$  buffer for  $^{22}\text{Na}^+$  influx studies,  $\text{Na}^+$ -free buffer for  $[\text{Na}^+]_i$  and for neurotoxin binding studies, or high  $\text{Na}^+$  buffer for glutamate release assays (buffer compositions given subsequently); all buffers were equilibrated with 95%  $\text{O}_2$ /5%  $\text{CO}_2$ . The synaptosomes were centrifuged at  $23,000 \times g$  for 10 min and resuspended in the appropriate buffer. Protein concentrations were determined by the method of Bradford<sup>26</sup> using bovine serum albumin as a standard.

### Measurement of $^{22}\text{Na}^+$ Influx

$^{22}\text{Na}^+$  influx was measured by a modification of the method of Tamkun and Catterall.<sup>21</sup> Synaptosomes (600–700  $\mu\text{g}$  protein in 150  $\mu\text{l}$  low  $\text{Na}^+$  buffer, consisting of 130 mM choline chloride, 5.4 mM KCl, 5 mM NaCl, 0.8 mM  $\text{MgSO}_4$ , 5.5 mM D-glucose, and 50 mM HEPES-Tris, pH 7.4) were preincubated at  $37^\circ\text{C}$  for 5 min in the absence or presence of halothane (added as a diluted solution in dimethylsulfoxide). After preincubation, 60  $\mu\text{M}$  veratridine with or without 80  $\mu\text{g}/\text{ml}$  scorpion venom was added, and the samples were incubated for 10 min at  $37^\circ\text{C}$ . Uptake was initiated by the addition of 1.3  $\mu\text{Ci}$  of carrier-free  $^{22}\text{NaCl}$  in 50  $\mu\text{l}$  low  $\text{Na}^+$  buffer and was terminated after 5 s by the addition of 3 ml of ice-cold washing buffer (163 mM choline chloride, 0.8 mM  $\text{MgSO}_4$ , 1.8 mM  $\text{CaCl}_2$ , and 5 mM HEPES-Tris, pH 7.4) and rapid vacuum filtration through GF/C glass fiber filters (Whatman, Kent, UK). Filters were washed twice with 3 ml washing buffer, and filter radioactivity was determined by liquid scintillation spectrometry using Bio-Safe NA scintillation cocktail (Research Products International Corp., Mount Prospect, IL). Nonspecific



HALOTHANE INHIBITS PRESYNAPTIC  $\text{Na}^+$  CHANNELS

( $\text{Na}^+$  channel-independent)  $^{22}\text{Na}^+$  uptake was determined in the presence of  $1 \mu\text{M}$  tetrodotoxin, a specific  $\text{Na}^+$  channel blocker.<sup>22</sup>

#### Measurement of Free Intrasyntosomal $[\text{Na}^+]_i$

$\text{Na}^+$  concentration was determined by ion-specific spectrofluorometry using a spectrofluorometer (Perkin Elmer LS-50B; Beaconsfield, UK) with continuous computer-assisted data acquisition.<sup>24</sup> SBFI-AM was used as the fluorescent indicator. Synaptosomes (5 mg protein) were suspended in 1 ml of a  $\text{Na}^+$ -free buffer (120 mM choline chloride, 5 mM KCl, 0.8 mM  $\text{MgSO}_4$ , 5 mM D-glucose, and 50 mM HEPES-Tris, pH 7.4) containing  $10 \mu\text{M}$  SBFI-AM and 0.01% (vol/vol) Pluronic F-127 (a non-ionic detergent that facilitates indicator uptake) and incubated for 2 h at room temperature. At the end of the loading period, synaptosomes were centrifuged at  $5,000 \times g$ , resuspended in indicator-free buffer, and centrifuged again at  $5,000 \times g$  to remove excess indicator. The synaptosomes were suspended in  $\text{Na}^+$ -free buffer and incubated for an additional 30 min to allow indicator hydrolysis. After incubation, aliquots of synaptosomes (0.5 mg protein) were centrifuged, and the pellets were stored on ice until use. For free  $[\text{Na}^+]_i$  determination, synaptosome pellets were resuspended in 1.5 ml of 120 mM  $\text{Na}^+$  buffer (same as  $\text{Na}^+$ -free buffer, except NaCl was replaced choline chloride) and incubated in a stirred quartz cuvette at  $37^\circ\text{C}$  in the absence or presence of halothane (added as aliquots of saturated buffer solution) for 5 min, followed by the addition of  $60 \mu\text{M}$  veratridine to activate  $\text{Na}^+$  channels. Synaptosomal  $[\text{Na}^+]_i$  was calculated by the fluorescence ratio method at an emission wavelength of 510 nm, with excitation wavelengths of 340 and 380 nm (switched every 2 s). The signal ratio was converted into free  $[\text{Na}^+]_i$  based on the method of Gryniewicz *et al.*<sup>27</sup> Calibration of the 340:380 nm excitation ratio in terms of free  $[\text{Na}^+]_i$  was performed for each synaptosome preparation. For calibration, SBFI-loaded synaptosomes were added to solutions of known extracellular  $[\text{Na}^+]$  made by appropriate mixtures of high- $[\text{Na}^+]$  and high-potassium ( $[\text{K}^+]$ ) solutions in the presence of  $40 \mu\text{M}$  monensin,  $2 \mu\text{M}$  gramicidin, and  $100 \mu\text{M}$  ouabain. The high- $[\text{Na}^+]$  solution contained 120 mM NaCl, 2 mM EGTA, and 10 mM HEPES-Tris, pH 7.4. The high- $[\text{K}^+]$  solution was identical except that  $\text{K}^+$  replaced  $\text{Na}^+$ . In control experiments, no quenching of SBFI fluorescence by veratridine or halothane was observed in the presence of monensin, a  $\text{Na}^+$  ionophore (data not shown).

#### Equilibrium Binding Assays

All reactions were performed at  $37^\circ\text{C}$  in Teflon-sealed glass vials to minimize loss of halothane.

#### $[^3\text{H}]$ Batrachotoxinin-A 20- $\alpha$ -Benzoate Binding.

$[^3\text{H}]$ BTX-B binding was determined as described by Postma and Catterall<sup>28</sup> using a  $\text{Na}^+$ -free buffer (135 mM choline chloride, 5.4 mM KCl, 0.8 mM  $\text{MgSO}_4$ , 5.5 mM D-glucose, and 50 mM HEPES-Tris, pH 7.4) plus  $10 \text{ nM}$   $[^3\text{H}]$ BTX-B,  $1 \mu\text{M}$  tetrodotoxin,  $80 \mu\text{g/ml}$  scorpion venom, and 1 mg/ml bovine serum albumin. Tetrodotoxin inhibits membrane depolarization due to  $\text{Na}^+$  flux through  $\text{Na}^+$  channels activated by BTX-B and scorpion venom.<sup>29</sup> Binding reactions were initiated by rapid mixing of synaptosomes ( $200 \mu\text{g}$  protein in  $100 \mu\text{l}$ ) with  $150 \mu\text{l}$  of the reaction mixture just described in the absence or presence of halothane (added as a diluted solution in dimethylsulfoxide) and were terminated after 60 min at  $37^\circ\text{C}$  by the addition of 3 ml of ice-cold washing buffer. Synaptosomes were collected on GF/C glass fiber filters (Brandel, Gaithersburg, MD) by vacuum filtration and washed three times with 3 ml washing buffer. Bound  $[^3\text{H}]$ BTX-B was determined by liquid scintillation spectrometry. Nonspecific binding (10–20% of total binding) was determined in the presence of 0.3 mM veratridine, which binds at the same site as BTX-B.<sup>29</sup>

**$[^3\text{H}]$ Brevetoxin-3 Binding.**  $[^3\text{H}]$ Brevetoxin-3 binding was determined as described by Edwards *et al.*,<sup>30</sup> with minor modifications. Synaptosomes ( $100 \mu\text{g}$  protein in  $100 \mu\text{l}$ ) were suspended in a  $\text{Na}^+$ -free buffer (135 mM choline chloride, 5.4 mM KCl, 0.8 mM  $\text{MgSO}_4$ , 5.5 mM D-glucose, 50 mM HEPES-Tris, pH 7.4) plus  $25 \text{ nM}$   $[^3\text{H}]$ brevetoxin-3 and 0.01% (vol/vol) Pluronic F-127, a nonionic detergent required to solubilize the high concentrations of unlabeled brevetoxin-3 used to determine nonspecific binding,<sup>31</sup> in the absence or presence of halothane (added as a diluted solution in dimethylsulfoxide). After rapid mixing, synaptosomes were incubated at  $4^\circ\text{C}$  for 1 h, after which the reaction was stopped by the addition of 3 ml ice-cold washing buffer. The synaptosomes were collected on GF/C glass fiber filters under vacuum and washed twice with 3 ml washing buffer. Bound  $[^3\text{H}]$ brevetoxin-3 was determined by liquid scintillation spectrometry. Nonspecific binding (10–15% of total binding) was measured in the presence of  $10 \mu\text{M}$  unlabeled brevetoxin-3.

**$[^3\text{H}]$ Saxitoxin Binding.**  $[^3\text{H}]$ Saxitoxin binding was determined as described by Catterall *et al.*<sup>32</sup> Synaptosomes ( $100 \mu\text{g}$  protein in  $100 \mu\text{l}$ ) were added to a reaction mixture ( $100 \mu\text{l}$ ) consisting of a  $\text{Na}^+$ -free buffer



(135 mM choline chloride, 5.4 mM KCl, 0.8 mM MgSO<sub>4</sub>, 5.5 mM D-glucose, and 50 mM HEPES-Tris, pH 7.4) plus 3 nM [<sup>3</sup>H]saxitoxin, in the absence or presence of halothane (added as a diluted solution in dimethylsulfoxide). Samples were rapidly mixed and incubated at 37°C for 30 min. Binding reactions were stopped by the addition of 3 ml of ice-cold washing buffer, and synaptosomes were collected on GF/C glass fiber filters under vacuum and washed twice over 10–15 s. Bound [<sup>3</sup>H]saxitoxin was determined by liquid scintillation spectrometry. Nonspecific binding (10–15% of total binding) was determined in the presence of 1 μM tetrodotoxin, which binds at the same site as saxitoxin.

#### Kinetic Binding Assays

The time course of [<sup>3</sup>H]BTX-B dissociation from the Na<sup>+</sup> channel receptor complex was analyzed by preincubating synaptosomes for 60 min with 10 nM [<sup>3</sup>H]BTX-B, 80 μg/ml scorpion venom, and 1 μM tetrodotoxin at 37°C, as in the equilibrium binding assays. Dissociation was initiated by adding 0.3 mM veratridine in the absence or presence of halothane (0.74 mM; minimum alveolar concentration [MAC] ≈ 2; added as a diluted solution in dimethylsulfoxide). Reactions were terminated (after 5, 10, 20, or 30 min) by vacuum filtration and washing, followed by determination of bound [<sup>3</sup>H]BTX-B. The dissociation rate constant ( $k_{-1}$ ) was calculated using the equation<sup>33</sup>  $\ln(B_t/B_0) = -k_{-1} \cdot t$ , where  $B_t$  is the specific binding of [<sup>3</sup>H]BTX-B at time  $t$ , and  $B_0$  is the specific binding of [<sup>3</sup>H]BTX-B at time zero. A plot of  $\ln(B_t/B_0)$  versus  $t$ , in the absence or presence of halothane, was linear with a slope of  $k_{-1}$ .

The rate of association of [<sup>3</sup>H]BTX-B was measured by incubating synaptosomes with 80 μg/ml scorpion venom for 15 min at 37°C in the absence or presence of halothane (0.74 mM; added as a diluted solution in dimethylsulfoxide) as in the equilibrium binding assays. [<sup>3</sup>H]BTX-B (10 nM) was then added to the synaptosomes to initiate binding. Parallel assays were performed in the presence of 0.3 mM veratridine to determine non-specific binding at each time point. Incubations were terminated (after 5, 10, 20, or 30 min) by vacuum filtration and washing followed by determination of bound [<sup>3</sup>H]BTX-B. The association rate constant ( $k_{+1}$ ) of [<sup>3</sup>H]BTX-B binding was calculated using the equation<sup>33</sup>  $\ln(B_{eq}/B_{eq} - B_t) = ([L]k_{+1} + k_{-1})t$ , where  $B_{eq}$  is the specific binding of [<sup>3</sup>H]BTX-B at equilibrium,  $B_t$  is the specific binding of [<sup>3</sup>H]BTX-B at time  $t$ ,  $[L]$  is the concentration of [<sup>3</sup>H]BTX-B, and  $k_{-1}$  is the dissociation rate constant for [<sup>3</sup>H]BTX-B from the Na<sup>+</sup> channel receptor

complex at the ambient drug concentration. A plot of  $\ln(B_{eq}/B_{eq} - B_t)$  versus  $t$  was linear, with a slope of  $[L]k_{+1} + k_{-1}$ , from which  $k_{+1}$  was calculated. The inhibition constant,  $K_i$ , for halothane was calculated from the equation:  $K_i = IC_{50}/(1 + L/K_d)$ , where  $L$  is the concentration of [<sup>3</sup>H]BTX-B (10 nM),  $K_d$  is the equilibrium dissociation constant for [<sup>3</sup>H]BTX-B (122 nM), and  $IC_{50}$  is the concentration of halothane which produced 50% inhibition of [<sup>3</sup>H]BTX-B binding. The dissociation constant  $K_d$  also was calculated from kinetic data as  $k_{-1}/k_{+1}$ .

#### Measurement of Release of Glutamate from Synaptosomes

Endogenous release of glutamate was measured by the method of Nicholls *et al.*<sup>34</sup> Synaptosomal pellets (0.5 mg protein) were resuspended in 1.5 ml release buffer (140 mM NaCl, 5 mM KCl, 1 mM MgCl<sub>2</sub>, 1.2 mM Na<sub>2</sub>HPO<sub>4</sub>, 5 mM NaHCO<sub>3</sub>, 10 mM D-glucose, and 20 mM HEPES, pH 7.4 with NaOH) plus 16 μM bovine serum albumin (essentially free of fatty acid), 1 mM NADP<sup>+</sup>, 100 U L-glutamate dehydrogenase, and 1.3 mM CaCl<sub>2</sub>. Stirred samples were equilibrated at 37°C for 4 min in a spectrofluorometer cuvette, and data acquisition was started with an excitation wavelength at 340 nm and an emission wavelength at 510 nm. After recording basal glutamate release, 50–350 μl buffer solution saturated with halothane was added, and the rate of release of glutamate (from 0–60 s) was measured. After recording release for 200 s after the addition of halothane, veratridine (60 μM) was added, and once again the rate of release of glutamate (from 0–60 s) was measured. The fluorescence signal was calibrated by adding 5 nmol L-glutamate to the cuvette at the end of each experiment.

#### Volatile Anesthetic Quantification

Volatile anesthetic agents were added as aliquots of saturated buffer solutions for measurement of  $[Na^+]_i$  and release of glutamate and were diluted in dimethylsulfoxide for measurement of <sup>22</sup>Na<sup>+</sup> influx and neurotoxin binding. Final anesthetic concentrations in each assay mixture were determined by gas chromatography.<sup>35</sup> A fixed amount of the assay mixture was withdrawn from the tube/cuvette with a gas-tight syringe and extracted into n-heptane. The n-heptane extract was injected onto a gas chromatograph (GC-8A; Shimadzu Corp., Kyoto, Japan) equipped with a thermal conductivity detector. Separation was achieved on a 1.8-m-long, 6-mm ID glass column packed with Porapak Q (Supelco, Bellefonte, PA). The column temperature



HALOTHANE INHIBITS PRESYNAPTIC  $\text{Na}^+$  CHANNELS

was 210°C, the injector temperature was 230°C, and carrier gas flow was 40 ml/min.

### Statistical Analysis

Statistical differences between control and experimental values were determined by analysis of variance with Fisher's *post hoc* test. Concentration-effect data were analyzed using a graded dose-response program that performs linear regression analysis on data between 20% and 80% of the maximal response (Pharm/PCS Pharmacologic Calculation System, Version 4.2; Springer Verlag, New York, NY). Confidence limits follow the derived  $\text{IC}_{50}$  values in the text.  $K_d$  values and maximum number of binding sites ( $B_{\text{max}}$ ) for [ $^3\text{H}$ ]BTX-B were calculated from Scatchard plots using Enzfitter (Elsevier-Biosoft, Cambridge, UK). Kinetic (association and dissociation) parameters were estimated by linear regression using the Pharm/PCS Pharmacologic Calculation System. Curves were fit to data by simple polynomial (figs. 1, 2, 3, 6, and 8) or linear (figs. 4, 5A, 5B, and 9) functions using Origin software (Microcal Software, Inc., Northampton, MA). Each experiment contained two to three replicates for each data point and was performed *n* times, as specified. Values are expressed as mean  $\pm$  SD.

Experiments were performed in accordance with the National Institutes of Health guide for the care and use of laboratory animals as approved by the Cornell University Medical College Institutional Animal Care and Use Committee.

## Results

### $\text{Na}^+$ Influx

Veratridine, an alkaloid neurotoxin that causes persistent activation of  $\text{Na}^+$  channels by binding to site two,<sup>22</sup> was used to stimulate  $^{22}\text{Na}^+$  influx into synaptosomes. Uptake was linear from 2–10 s (data not shown); a 5-s uptake period was used in subsequent experiments. Specific  $^{22}\text{Na}^+$  uptake stimulated by 60  $\mu\text{M}$  veratridine, which causes maximal stimulation of  $^{22}\text{Na}^+$  influx into rat cortical synaptosomes,<sup>24</sup> was  $73 \pm 6 \text{ nmol} \cdot \text{mg}^{-1} \cdot \text{min}^{-1}$  ( $n = 3$ ). Veratridine-evoked  $^{22}\text{Na}^+$  uptake was completely inhibited by 1  $\mu\text{M}$  tetrodotoxin, indicating that it is  $\text{Na}^+$  channel mediated. Some experiments included *Leirus quinquestriatus* scorpion venom, which contains  $\alpha$ -scorpion toxins, small polypeptide neurotoxins that bind to site three to inhibit  $\text{Na}^+$  channel inactivation and that interact cooperatively with toxin binding to site two.<sup>29</sup> Scorpion venom augmented veratridine-evoked uptake to  $138 \pm 9$

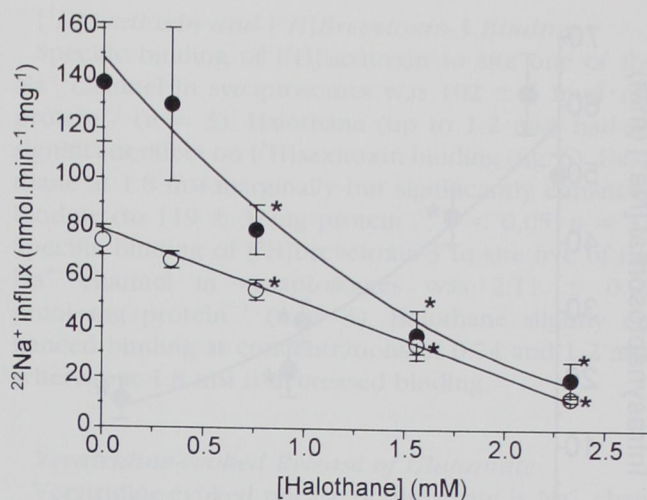

Fig. 1. Inhibition of veratridine-evoked  $^{22}\text{Na}^+$  influx into synaptosomes by halothane.  $\text{Na}^+$  channel-dependent  $\text{Na}^+$  uptake was evoked with 60  $\mu\text{M}$  veratridine in the absence (open circles) or presence (filled circles) of 80  $\mu\text{g}/\text{ml}$  scorpion venom. Non-specific uptake in the presence of 1  $\mu\text{M}$  tetrodotoxin was subtracted to obtain specific uptake (points represent mean  $\pm$  SD of three different experiments performed in duplicate). \* $P < 0.05$  versus control (no halothane) by analysis of variance with Fisher's *post hoc* test.

$\text{nmol} \cdot \text{mg}^{-1} \cdot \text{min}^{-1}$  ( $n = 3$ ). Halothane inhibited veratridine-evoked  $^{22}\text{Na}^+$  uptake in a concentration-dependent manner in the absence ( $\text{IC}_{50} = 1.1 \text{ mM}$ ; range, 0.8–1.4 mM) or presence ( $\text{IC}_{50} = 1.1 \text{ mM}$ ; range, 0.8–1.4 mM) of scorpion venom with comparable efficacy and potency (fig. 1). Basal uptake (in the absence of veratridine) was not affected by halothane (data not shown).

### Intrasynaptosomal $[\text{Na}^+]_i$

Veratridine (60  $\mu\text{M}$ ) increased free  $[\text{Na}^+]_i$  in synaptosomes fourfold, from  $17 \pm 2$  to  $67 \pm 5 \text{ mM}$ , in 120 mM  $\text{Na}^+$ -containing buffer ( $n = 4$ ); this effect was completely blocked by 1  $\mu\text{M}$  tetrodotoxin (data not shown). Halothane did not affect resting  $[\text{Na}^+]_i$  but significantly inhibited veratridine-evoked increase in  $[\text{Na}^+]_i$  in a concentration-dependent manner ( $\text{IC}_{50} = 0.97 \text{ mM}$ ; range, 0.6–1.4 mM;  $n = 3$ ; fig. 2).

### [ $^3\text{H}$ ]Batrachotoxinin-A 20- $\alpha$ -Benzoate Binding

[ $^3\text{H}$ ]BTX-B binding to synaptosomes was measured in the presence of scorpion venom, which enhanced specific [ $^3\text{H}$ ]BTX-B binding nearly 16-fold, from  $24 \pm 3$  to  $380 \pm 55 \text{ fmol}/\text{mg}$  ( $n = 6$ ), without affecting nonspecific binding. Scatchard analysis of [ $^3\text{H}$ ]BTX-B binding in the absence of halothane revealed binding to a single



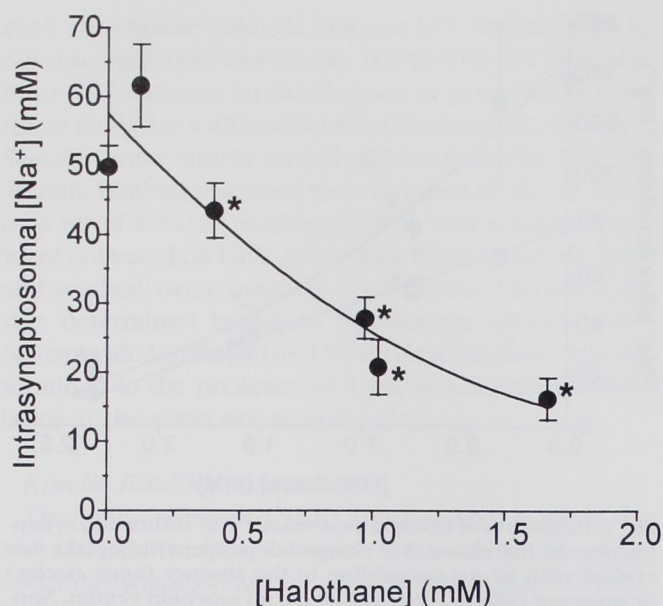

Fig. 2. Inhibition of the veratridine-evoked increase in free intrasynaptosomal  $[Na^+] ([Na^+]_i)$  by halothane. Synaptosomes were loaded with SBFI-AM, and  $[Na^+]_i$  was determined after stimulation with  $60 \mu M$  veratridine using the fluorescence ratio method. Fluorescence data were converted to  $[Na^+]_i$  by calibration with  $Na^+$  standards. Data (mean  $\pm$  SD of three different experiments performed in duplicate) are presented as the veratridine-evoked increase in  $[Na^+]_i$  (the difference between resting and veratridine-evoked  $[Na^+]_i$ ). \* $P < 0.05$  versus control (no halothane) by analysis of variance with Fisher's *post hoc* test.

class of high affinity binding sites with a  $K_d$  value of  $122 \pm 8$  nM and a  $B_{max}$  of  $2.43 \pm 0.18$  pmol  $\cdot$  mg protein $^{-1}$  ( $n = 3$ ; fig. 3), values which are similar to those reported previously.<sup>23,29,36</sup> Halothane inhibited specific [ $^3$ H]BTX-B binding in a concentration-dependent manner ( $IC_{50} = 0.53$  mM; range, 0.37–0.71 mM;  $n = 3$ ; fig. 4) without affecting nonspecific binding (data not shown); the calculated  $K_i$  value for halothane was 0.49 mM. Halothane (0.74 mM) increased the  $K_d$  value for [ $^3$ H]BTX-B to  $478 \pm 60$  nM ( $P < 0.05$ ) without significantly affecting  $B_{max}$  ( $3.14 \pm 0.43$  pmol  $\cdot$  mg protein $^{-1}$ ;  $P = 0.14$ ;  $n = 3$ ). This effect is most consistent with a competitive mechanism for inhibition of [ $^3$ H]BTX-B binding. The Hill coefficient for inhibition of [ $^3$ H]BTX-B binding by halothane was 1.0 (data not shown), suggesting an interaction with a single class of binding sites.

#### Kinetics of [ $^3$ H]Batrachotoxinin-A 20- $\alpha$ -Benzoate Binding

The  $k_{+1}$  value for [ $^3$ H]BTX-B binding in the absence of halothane was  $0.0032 \pm 0.0002$  min $^{-1}$  (fig. 5A). Halothane

(0.74 mM) decreased the rate of association of [ $^3$ H]BTX-B to  $0.0023 \pm 0.0002$  min $^{-1}$  ( $P < 0.05$ ;  $n = 3$ ).

The  $k_{-1}$  value for [ $^3$ H]BTX-B dissociation from the  $Na^+$  channel receptor complex was  $0.005 \pm 0.001$  min $^{-1}$  (fig. 5B). Halothane (0.74 mM) significantly enhanced the dissociation rate to  $0.010 \pm 0.002$  min $^{-1}$  ( $P < 0.05$ ;  $n = 3$ ). The calculated  $K_d$  values ( $K_d = k_{-1}/k_{+1}$ ) for [ $^3$ H]BTX-B were  $1.54 \pm 0.23$  nM in the absence and  $4.35 \pm 0.5$  nM in the presence of halothane ( $P < 0.05$ ;  $n = 3$ ). Lower  $K_d$  values calculated from the kinetic data compared with those obtained from equilibrium binding also were observed for [ $^3$ H]BTX-B binding in cardiac myocytes.<sup>33</sup> The halothane-induced increase in  $K_d$  calculated from equilibrium binding (3.9-fold) is in good agreement with the increase calculated from the kinetic data (2.8-fold).

An effect of halothane on rebinding of dissociated [ $^3$ H]-BTX-B is unlikely, because dissociation assays contained a saturating concentration of veratridine (0.3 mM), a direct competitive inhibitor of [ $^3$ H]-BTX-B binding.<sup>29</sup>

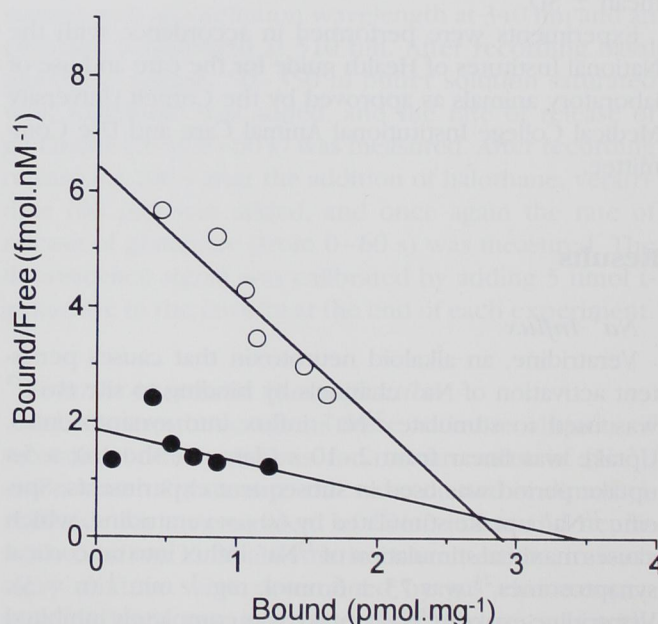

Fig. 3. Scatchard analysis of the effect of halothane on [ $^3$ H]BTX-B binding. Synaptosomes were incubated with various concentrations of [ $^3$ H]BTX-B in the absence (open circles) or presence (filled circles) of 0.74 mM halothane. Data shown are from a representative experiment ( $n = 3$ ) in which duplicate determinations were made. Values for  $B_{max}$  were 2.9 and 3.4 pmol  $\cdot$  mg protein $^{-1}$  in the absence and presence of halothane, respectively ( $P = 0.25$ ). Values for  $K_d$  were 125 and 450 nM in the absence or presence of halothane, respectively ( $P < 0.05$ ).



HALOTHANE INHIBITS PRESYNAPTIC  $\text{Na}^+$  CHANNELS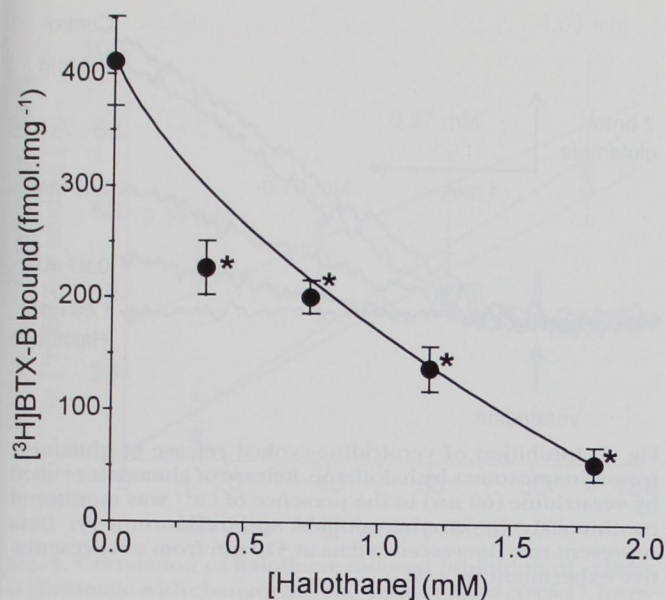

Fig. 4. Inhibition of  $[^3\text{H}]\text{BTX-B}$  binding to synaptosomes by halothane. Synaptosomes were incubated with  $10 \text{ nM}$   $[^3\text{H}]\text{BTX-B}$  for 1 h at  $37^\circ\text{C}$ . Data represent mean  $\pm$  SD ( $n = 3$ ) with duplicate determinations.  $^*P < 0.05$  versus control (no halothane) by analysis of variance with Fisher's *post hoc* test.

 $[^3\text{H}]\text{Saxitoxin}$  and  $[^3\text{H}]\text{Brevetoxin-3}$  Binding

Specific binding of  $[^3\text{H}]\text{saxitoxin}$  to site one of the  $\text{Na}^+$  channel in synaptosomes was  $102 \pm 5 \text{ fmol} \cdot \text{mg protein}^{-1}$  ( $n = 3$ ). Halothane (up to  $1.2 \text{ mM}$ ) had no significant effect on  $[^3\text{H}]\text{saxitoxin}$  binding (fig. 6). Halothane at  $1.8 \text{ mM}$  marginally but significantly enhanced binding (to  $119 \pm 3 \cdot \text{mg protein}^{-1}$ ;  $P < 0.05$ ;  $n = 3$ ). Specific binding of  $[^3\text{H}]\text{brevetoxin-3}$  to site five of the  $\text{Na}^+$  channel in synaptosomes was  $2.11 \pm 0.02 \text{ pmol} \cdot \text{mg protein}^{-1}$  ( $n = 3$ ). Halothane slightly enhanced binding at concentrations of  $0.74$  and  $1.2 \text{ mM}$ , whereas at  $1.8 \text{ mM}$  it decreased binding.

## Veratridine-evoked Release of Glutamate

Veratridine-evoked release of glutamate is  $\text{Na}^+$  channel-dependent (tetrodotoxin-sensitive)<sup>2</sup> and therefore can be used to assess the functional significance of presynaptic  $\text{Na}^+$  channel inhibition by halothane. Veratridine-evoked release of glutamate in the presence of  $1.3 \text{ mM}$   $\text{Ca}^{2+}$  was completely blocked by  $1 \mu\text{M}$  tetrodotoxin (data not shown). Halothane inhibited veratridine-evoked release of glutamate in a concentration-dependent manner ( $\text{IC}_{50} = 0.67 \text{ mM}$ ; range,  $0.57$ – $0.89 \text{ mM}$ ;  $n = 3$ ; figs. 7 and 8). Correlations between the percentage

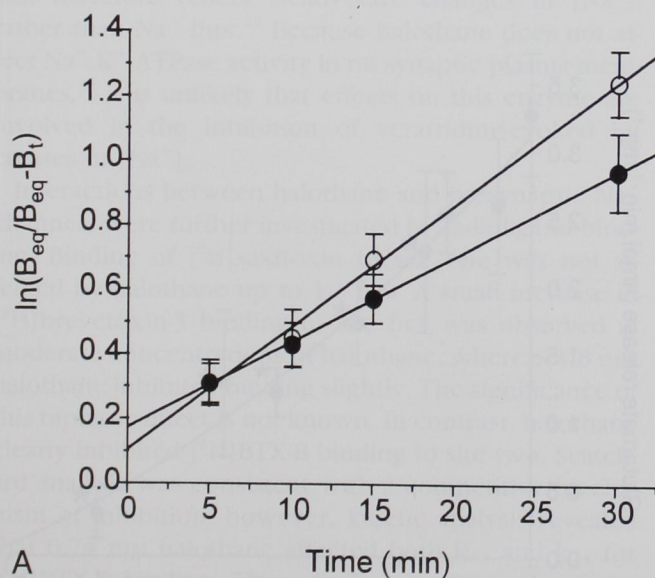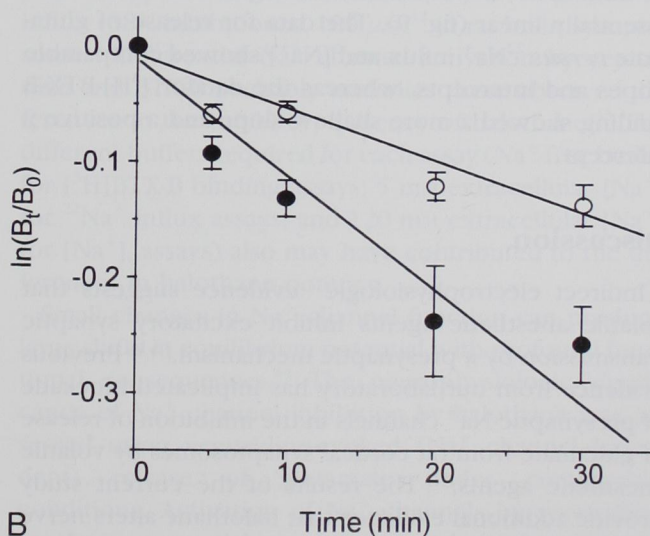

Fig. 5. Effects of halothane on the kinetics of  $[^3\text{H}]\text{BTX-B}$  binding. (A) Rate of association of  $[^3\text{H}]\text{BTX-B}$ . Synaptosomes were incubated with  $10 \text{ nM}$   $[^3\text{H}]\text{BTX-B}$  in the absence (open circles) or presence (filled circles) of  $0.74 \text{ mM}$  halothane for the indicated times at  $37^\circ\text{C}$ , and specific  $[^3\text{H}]\text{BTX-B}$  binding was determined. Association rate constants ( $k_{+1}$ ) were calculated from the slopes by linear regression. (B) Rate of dissociation of  $[^3\text{H}]\text{BTX-B}$ . Synaptosomes were preincubated with  $10 \text{ nM}$   $[^3\text{H}]\text{BTX-B}$  for 60 min at  $37^\circ\text{C}$ . At time zero, dissociation was initiated by the addition of  $0.3 \text{ mM}$  veratridine in the absence (open circles) or presence (filled circles) of  $0.74 \text{ mM}$  halothane, and specific  $[^3\text{H}]\text{BTX-B}$  binding was determined. Dissociation rate constants ( $k_{-1}$ ) were determined from the slopes by linear regression. Data represent mean  $\pm$  SD ( $n = 3$ ) with duplicate determinations.



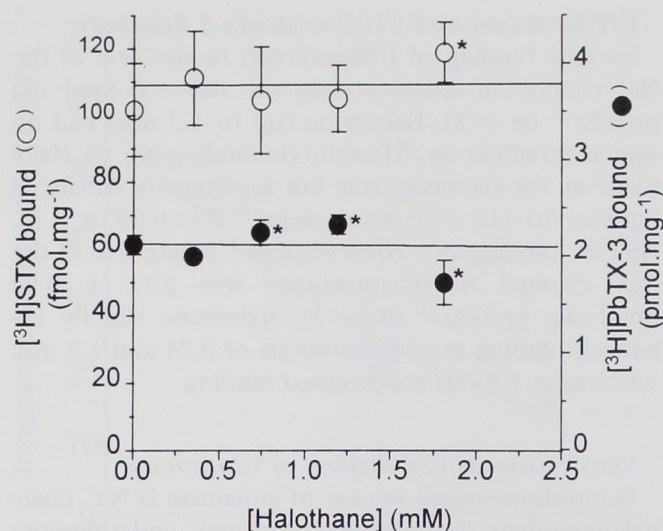

Fig. 6. Effects of halothane on [ $^3\text{H}$ ]saxitoxin and [ $^3\text{H}$ ]brevetoxin-3 binding to synaptosomes. Synaptosomes were incubated with either 3 nM [ $^3\text{H}$ ]saxitoxin (open circles) or 25 nM [ $^3\text{H}$ ]brevetoxin-3 (filled circles) for 30 min at  $37^\circ\text{C}$  (saxitoxin) or for 1 h at  $4^\circ\text{C}$  (brevetoxin-3). Data represent mean  $\pm$  SD ( $n = 3$ ) with duplicate determinations. \* $P < 0.05$  versus control (no halothane) by analysis of variance with Fisher's *post hoc* test.

inhibition by halothane of release of glutamate versus  $^{22}\text{Na}^+$  influx ( $r^2 = 0.94$ ), change in  $[\text{Na}^+]_i$  ( $r^2 = 0.99$ ), or inhibition of [ $^3\text{H}$ ]BTX-B binding ( $r^2 = 0.96$ ) were essentially linear (fig. 9). The data for release of glutamate versus  $^{22}\text{Na}^+$  influx and  $[\text{Na}^+]_i$  showed comparable slopes and intercepts, whereas the data for [ $^3\text{H}$ ]BTX-B binding showed a more shallow slope and a positive y intercept.

## Discussion

Indirect electrophysiologic evidence suggests that volatile anesthetic agents inhibit excitatory synaptic transmission by a presynaptic mechanism.<sup>13,14</sup> Previous evidence from our laboratory has implicated blockade of presynaptic  $\text{Na}^+$  channels in the inhibition of release of glutamate from rat cortical synaptosomes by volatile anesthetic agents.<sup>12</sup> The results of the current study provide additional evidence that halothane alters nerve terminal function by interacting with  $\text{Na}^+$  channels to inhibit release of glutamate.

Halothane inhibited veratridine-evoked  $^{22}\text{Na}^+$  influx into synaptosomes. Because  $^{22}\text{Na}^+$  influx is directly proportional to ion channel  $\text{Na}^+$  permeability and to the number of open channels,<sup>22</sup> reductions in  $\text{Na}^+$  influx

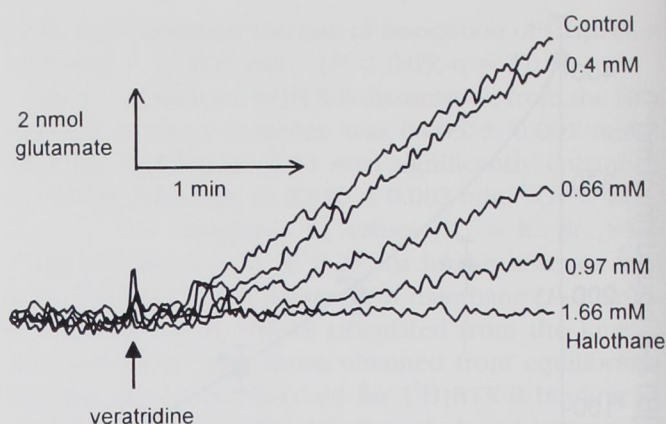

Fig. 7. Inhibition of veratridine-evoked release of glutamate from synaptosomes by halothane. Release of glutamate evoked by veratridine ( $60 \mu\text{M}$ ) in the presence of  $\text{Ca}^{2+}$  was monitored continuously by enzyme-coupled spectrofluorometry. Data represent raw fluorescence data at 510 nm from a representative experiment ( $n = 3$ ).

reflect reduced presynaptic  $\text{Na}^+$  channel opening or permeability. Halothane did not affect  $^{22}\text{Na}^+$  influx into synaptosomes in the presence of tetrodotoxin, which indicates a lack of effects on other modes of  $\text{Na}^+$  entry.

Inhibition by halothane of  $^{22}\text{Na}^+$  influx through presynaptic  $\text{Na}^+$  channels was confirmed by its inhibition

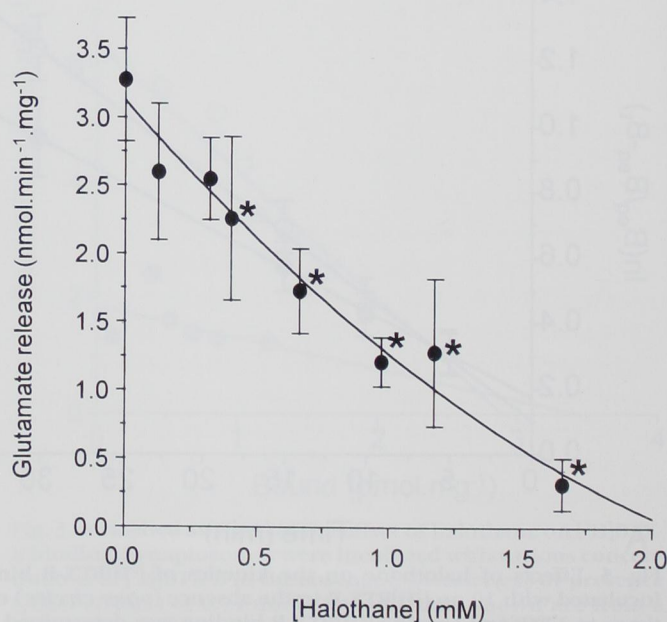

Fig. 8. Concentration-effect curve for halothane on veratridine-evoked release of glutamate from synaptosomes. Data are mean  $\pm$  SD ( $n = 3$ ). \* $P < 0.05$  versus control (no halothane) by analysis of variance with Fisher's *post hoc* test.



HALOTHANE INHIBITS PRESYNAPTIC  $\text{Na}^+$  CHANNELS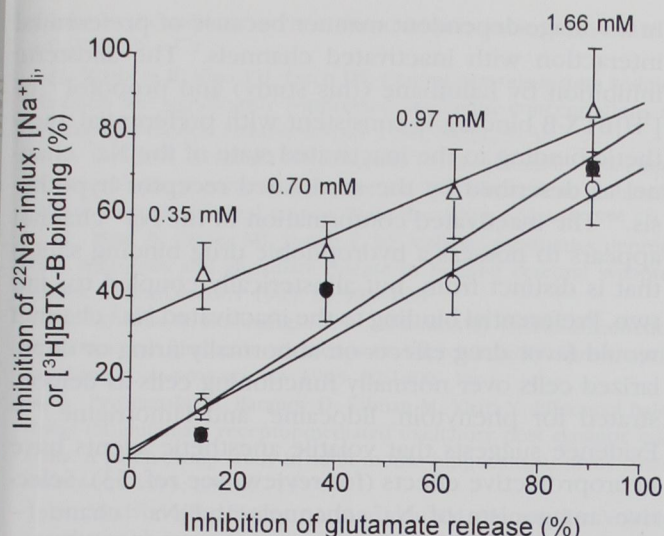

Fig. 9. Correlation of halothane-induced inhibition of release of glutamate with changes in  $^{22}\text{Na}^+$  influx (filled circles), intrasynaptosomal  $[\text{Na}^+]_i$  ( $[\text{Na}^+]_i$ ; open circles), and  $[^3\text{H}]\text{BTX-B}$  binding (open triangles). Points represent mean  $\pm$  SD ( $n = 3$ ) observed in the presence of 0.35, 0.70, 0.97, or 1.66 mM halothane.

of veratridine-evoked changes in  $[\text{Na}^+]_i$  measured using a  $\text{Na}^+$ -sensitive fluorescent probe. These changes were monitored for longer periods than in the flux studies and therefore reflect steady-state changes in  $[\text{Na}^+]_i$  rather than  $\text{Na}^+$  flux.<sup>22</sup> Because halothane does not affect  $\text{Na}^+$ ,  $\text{K}^+$ -ATPase activity in rat synaptic plasma membranes,<sup>37</sup> it is unlikely that effects on this enzyme are involved in the inhibition of veratridine-evoked increases in  $[\text{Na}^+]_i$ .

Interactions between halothane and presynaptic  $\text{Na}^+$  channels were further investigated by radioligand binding. Binding of  $[^3\text{H}]\text{saxitoxin}$  to site one was not affected by halothane up to 1.2 mM. A small increase in  $[^3\text{H}]\text{brevetoxin-3}$  binding to site five was observed at moderate concentrations of halothane, whereas 1.8 mM halothane inhibited binding slightly. The significance of this biphasic effect is not known. In contrast, halothane clearly inhibited  $[^3\text{H}]\text{BTX-B}$  binding to site two. Scatchard analysis was consistent with a competitive mechanism of inhibition; however, kinetic analysis revealed that 0.74 mM halothane affected both  $k_{+1}$  and  $k_{-1}$  for  $[^3\text{H}]\text{BTX-B}$  binding. These findings indicate that halothane inhibits  $[^3\text{H}]\text{BTX-B}$  binding by an allosteric mechanism, primarily by an increase in the dissociation rate. The effect of halothane on  $[^3\text{H}]\text{BTX-B}$  binding does not appear to be due to an indirect effect on scorpion toxin binding to site three (used to enhance  $[^3\text{H}]\text{BTX-B}$  bind-

ing), because halothane inhibited  $^{22}\text{Na}^+$  influx with similar potency in the absence or presence of scorpion venom.

Allosteric competitive inhibition of  $[^3\text{H}]\text{BTX-B}$  binding also has been observed for other clinically useful drugs, including local anesthetic agents, class I anticonvulsants, class I antiarrhythmic agents,<sup>38</sup> and propofol.<sup>23</sup> Most of these compounds have no significant effects on neurotoxin binding to other receptor sites on the  $\text{Na}^+$  channel. Taken together, these studies suggest a common general mechanism for  $\text{Na}^+$  channel inhibition by several classes of drugs with distinct chemical structures mediated by a common conformational effect on the channel.

The MAC of halothane for surgical anesthesia is 0.76 vol% in humans and 1.24 vol% in rats.<sup>39</sup> Corresponding aqueous halothane concentrations at 37°C were calculated as 0.21 and 0.35 mM for humans and rats, respectively.<sup>40</sup> Halothane significantly inhibited veratridine-evoked increases in  $^{22}\text{Na}^+$  influx,  $[\text{Na}^+]_i$ , and  $[^3\text{H}]\text{BTX-B}$  binding in rat cortical synaptosomes at clinical concentrations. The potency for inhibition of  $[^3\text{H}]\text{BTX-B}$  binding ( $\text{IC}_{50} = 0.53$  mM; 1.5 MAC) was greater than for inhibition of veratridine-evoked changes in  $[\text{Na}^+]_i$  ( $\text{IC}_{50} = 0.97$  mM; 2.8 MAC) and  $^{22}\text{Na}^+$  influx ( $\text{IC}_{50} = 1.1$  mM; 3.1 MAC). A similar difference was reported for phenytoin inhibition of  $[^3\text{H}]\text{BTX-B}$  binding ( $\text{IC}_{50} = 40$   $\mu\text{M}$ )<sup>41</sup> compared with veratridine-evoked (60  $\mu\text{M}$ )  $^{24}\text{Na}^+$  influx (38% inhibition at 100  $\mu\text{M}$ )<sup>42</sup> in rat brain synaptosomes. Differential  $\text{Na}^+$  channel activation by veratridine and BTX-B probably underlies these observed differences in the inhibitory potency of halothane.<sup>43</sup> The different buffers required for each assay ( $\text{Na}^+$ -free buffer for  $[^3\text{H}]\text{BTX-B}$  binding assays; 5 mM extracellular  $[\text{Na}^+]$  for  $^{22}\text{Na}^+$  influx assays, and 120 mM extracellular  $[\text{Na}^+]$  for  $[\text{Na}^+]_i$  assays) also may have contributed to the differences in halothane potency.

Small changes in  $\text{Na}^+$  channel function can produce large shifts in equilibrium potential with profound functional consequences.<sup>44</sup> The neurophysiologic significance of  $\text{Na}^+$  channel inhibition by halothane was assessed using veratridine-evoked ( $\text{Na}^+$  channel-dependent) release of glutamate under comparable conditions. Activation of  $\text{Na}^+$  channels by veratridine results in sequential membrane depolarization, voltage-dependent opening of  $\text{Ca}^{2+}$  channels, and  $\text{Ca}^{2+}$ -dependent exocytotic release of neurotransmitters.<sup>2</sup> The rise in intracellular  $[\text{Na}^+]$  also results in reversal of  $\text{Na}^+/\text{Ca}^{2+}$  antiport and reversal of  $\text{Na}^+/\text{glutamate}$  cotransport. Although veratridine evokes both  $\text{Ca}^{2+}$ -independent (car-



rier-mediated) and -dependent (exocytotic) glutamate release from synaptosomes, the major component of release is  $\text{Ca}^{2+}$ -dependent,<sup>24</sup> similar to physiologic release; however, the pathway for  $\text{Ca}^{2+}$  entry is not clear and may differ from action potential-evoked  $\text{Ca}^{2+}$ .

Inhibition of veratridine-evoked release of glutamate by halothane ( $\text{IC}_{50} = 0.67 \text{ mM}$ ; 1.9 MAC) *via*  $\text{Na}^+$  channel blockade could involve one or more of the following mechanisms: (1) inhibition of  $\text{Na}^+$  channel-dependent membrane depolarization and consequently of  $\text{Ca}^{2+}$  channel activation; (2) inhibition of  $\text{Ca}^{2+}$  entry through veratridine-modified  $\text{Na}^+$  channels<sup>45</sup>; (3) inhibition of  $\text{Na}^+$ /glutamate transporter reversal or stimulation of glutamate reuptake; or (4) inhibition of  $\text{Na}^+$ / $\text{Ca}^{2+}$  exchange. Blockade of presynaptic  $\text{Ca}^{2+}$  channels coupled to release of glutamate or interference with subsequent release mechanisms also could contribute to the effect of halothane.<sup>11</sup>  $\text{Na}^+$  channel-independent mechanisms appear quantitatively less important than an effect at  $\text{Na}^+$  channels because release of glutamate evoked by KCl, a secretagogue not dependent on  $\text{Na}^+$  channel function, was insensitive to halothane under our assay conditions.<sup>12</sup> The sensitivity of veratridine-evoked release of glutamate to halothane was comparable to that of release of glutamate evoked by 4-aminopyridine ( $\text{IC}_{50} = 0.5 \text{ mM}$ <sup>12</sup>), which also evokes  $\text{Na}^+$  channel-dependent (tetrodotoxin-sensitive) release. Because halothane had no effect on basal or spontaneous release of glutamate, which is due primarily to reversed  $\text{Na}^+$ /glutamate uptake,<sup>46</sup> a direct effect on the  $\text{Na}^+$ /glutamate transporter is unlikely. Stimulation of glutamate reuptake is also an unlikely mechanism because halothane (3–4 vol%) did not affect [ $^3\text{H}$ ]glutamate uptake into rat cortical synaptosomes significantly.<sup>47,48</sup>

Halothane and other volatile anesthetic agents also affect other targets, including ligand-gated ion channels, which have been proposed as principal sites for anesthetic action.<sup>49</sup> For example, halothane potentiated  $\gamma$ -aminobutyric acid type A receptor-mediated  $\text{Cl}^-$  current in rat hippocampal neurons (at 1.0–1.5 MAC)<sup>50</sup>; increased  $^{36}\text{Cl}^-$  uptake through  $\gamma$ -aminobutyric acid-gated  $\text{Cl}^-$  channels (50% effective concentration [ $\text{EC}_{50}$ ] = 2.2 mM)<sup>51</sup>; and inhibited  $t$ -[ $^{35}\text{S}$ ]butylbicyclopophosphorothionate binding to cortical membranes ( $\text{IC}_{50} = 1.68 \text{ mM}$ ).<sup>51</sup> These actions of halothane occur at concentrations comparable to or higher than those reported here for inhibition of  $\text{Na}^+$  channels. Thus,  $\text{Na}^+$  channel inhibition must also be considered as a potential target for the effects of halothane on the CNS.

Volatile anesthetic agents suppress CNS  $\text{Na}^+$  channels

in a voltage-dependent manner because of preferential interaction with inactivated channels.<sup>9</sup> The allosteric inhibition by halothane (this study) and propofol<sup>23</sup> of [ $^3\text{H}$ ]BTX-B binding is consistent with preferential anesthetic binding to the inactivated state of the  $\text{Na}^+$  channel as described by the modulated receptor hypothesis.<sup>38</sup> The inactivated conformation of the  $\text{Na}^+$  channel appears to possess a hydrophobic drug binding site(s) that is distinct from, but allosterically coupled to, site two. Preferential binding to the inactivated  $\text{Na}^+$  channel would favor drug effects on abnormally firing or depolarized cells over normally functioning cells as demonstrated for phenytoin, lidocaine, and lamotrigine.<sup>38,52</sup> Evidence suggests that volatile anesthetic agents have neuroprotective effects (for review, see ref. 53). Selective antagonism of  $\text{Na}^+$  channels and  $\text{Na}^+$  channel-dependent release of glutamate in repetitively active or ischemically depolarized neurons underlies the neuroprotective mechanism of several drugs<sup>54</sup> and also may contribute to the neuroprotective properties of some general anesthetic agents.<sup>55</sup>

Halothane interacts with presynaptic  $\text{Na}^+$  channels to inhibit veratridine-evoked  $\text{Na}^+$  influx,  $[\text{Na}^+]_i$  changes, and release of glutamate, actions which may contribute to its anesthetic and neuroprotective properties. Taken together with our previous studies of volatile anesthetic agents<sup>12</sup> and propofol,<sup>23,24</sup> these findings emphasize that presynaptic  $\text{Na}^+$  channels may be important targets for general anesthetic inhibition of excitatory neurotransmission in the CNS.

## References

1. Catterall WA: Structure and function of voltage-gated ion channels. *Ann Rev Biochem* 1995; 64:493–531
2. Nicholls DG: The glutamatergic nerve terminal. *Eur J Biochem* 1993; 212:613–31
3. Larrabee MG, Posternak JM: Selective action of anesthetics on synapses and axons in mammalian sympathetic ganglia. *J Neurophysiol* 1952; 15:91–114
4. Strichartz G: Use-dependent conduction block produced by volatile general anesthetic agents. *Acta Anaesth Scand* 1980; 24:402–6
5. Berg-Johnson J, Langmoen IA: Mechanisms concerned in the direct effect of isoflurane on rat hippocampal and human neocortical neurons. *Brain Res* 1990; 507:28–34
6. Butterworth JF IV, Raymond SA, Roscoe RF: Effects of halothane and enflurane on firing threshold of frog myelinated axons. *J Physiol* 1989; 411:493–516
7. Bean BP, Shrager P, Goldstein DA: Modification of sodium and potassium channel gating kinetics by ether and halothane. *J Gen Physiol* 1981; 77:233–53
8. Haydon DA, Urban BW: The effects of some inhalation anaes-



HALOTHANE INHIBITS PRESYNAPTIC  $\text{Na}^+$  CHANNELS

- thetics on the sodium current of the squid giant axon. *J Physiol* 1983; 341:429-39
9. Rehberg B, Xiao YH, Duch DS: Central nervous system sodium channels are significantly suppressed at clinical concentrations of volatile anesthetics. *ANESTHESIOLOGY* 1996; 84:1223-33
  10. Larsen M, Grondahl TO, Haugstad TS, Langmoen IA: The effect of the volatile anesthetic isoflurane on  $\text{Ca}^{2+}$ -dependent glutamate release from rat cerebral cortex. *Brain Res* 1994; 663:335-7
  11. Miao N, Frazer MJ, Lynch C III: Volatile anesthetics depress  $\text{Ca}^{2+}$  transients and glutamate release in isolated cerebral synaptosomes. *ANESTHESIOLOGY* 1995; 83:593-603
  12. Schlame M, Hemmings HC Jr: Inhibition by volatile anesthetics of endogenous glutamate release from synaptosomes by a presynaptic mechanism. *ANESTHESIOLOGY* 1995; 82:1406-16
  13. Perouansky M, Baranov D, Salman M, Yaari Y: Effects of halothane on glutamate receptor-mediated excitatory post synaptic currents: A patch-clamp study in adult mouse hippocampal slices. *ANESTHESIOLOGY* 1995; 83:109-19
  14. MacIver MB, Mikulec AA, Amagasa SM, Monroe EA: Volatile anesthetics depress glutamate transmission via presynaptic actions. *ANESTHESIOLOGY* 1996; 85:823-34
  15. Kress HG, Muller J, Eisert A, Gilge U, Tas PW, Koschel K: Effects of volatile anesthetics on cytoplasmic  $\text{Ca}^{2+}$  signaling and transmitter release in a neural cell line. *ANESTHESIOLOGY* 1991; 74:309-19
  16. Bleakman D, Jones MV, Harrison NL: The effects of four general anesthetics on intracellular  $[\text{Ca}^{2+}]$  in cultured rat hippocampal neurons. *Neuropharmacology* 1995; 34:541-51
  17. Drenger B, Heitmiller ES, Quigg M, Blanck TJJ: Depression of calcium channel blocker binding to rat brain membranes by halothane. *Anesth Analg* 1992; 74:758-61
  18. Moody EJ, Harris B, Hoehner P, Skolnick P: Inhibition of  $[\text{H}^3]$ isradipine binding to L-type channels by the optical isomers of isoflurane: Lack of stereospecificity. *ANESTHESIOLOGY* 1994; 81:124-8
  19. Study RE: Isoflurane inhibits multiple voltage-gated calcium currents in hippocampal pyramidal neurons. *ANESTHESIOLOGY* 1994; 81:104-16
  20. Minami K, Yanagihara N, Toyohira Y, Tsutsui M, Shigematsu A, Wada A, Izumi F: Isoflurane inhibits nicotinic acetylcholine receptor-mediated  $^{22}\text{Na}^+$  influx and muscarinic receptor-evoked cyclic GMP production in cultured bovine adrenal medullary cells. *Naunyn-Schmiedeberg Arch Pharmacol* 1994; 349:223-9
  21. Tamkun MM, Catterall WA: Ion flux studies of voltage sensitive sodium channels in synaptic nerve-ending particles. *Mol Pharmacol* 1981; 19:78-86
  22. Krueger BK, Blaustein MP, Ratzlaff RW: Sodium channels in presynaptic nerve terminals: Regulation by neurotoxins. *J Gen Physiol* 1980; 76:287-313
  23. Ratnakumari L, Hemmings HC Jr: Inhibition by propofol of  $[\text{H}^3]$ -batrachotoxinin-A 20- $\alpha$ -benzoate binding to voltage-dependent sodium channels in rat cortical synaptosomes. *Br J Pharmacol* 1996; 119:1498-504
  24. Ratnakumari L, Hemmings HC Jr: Effects of propofol on sodium channel-dependent sodium influx and glutamate release in rat cerebrocortical synaptosomes. *ANESTHESIOLOGY* 1997; 86:428-39
  25. Dunkley PR, Jarrie PE, Heath JW, Kidd GJ, Rostas JAP: A rapid method for isolation of synaptosomes on Percoll gradients. *Brain Res* 1986; 372:115-29
  26. Bradford MM: A rapid and sensitive method for the quantitation of microgram quantities of protein utilizing the principle of protein-dye binding. *Anal Biochem* 1976; 72:248-54
  27. Grynkiewicz G, Poenie M, Tsien RY: A new generation of  $\text{Ca}^{2+}$  indicators with greatly improved fluorescence properties. *J Biol Chem* 1985; 260:3440-50
  28. Postma SW, Catterall WA: Inhibition of binding of  $[\text{H}^3]$ batrachotoxinin A 20- $\alpha$ -benzoate to sodium channels by local anesthetics. *Mol Pharmacol* 1984; 25:219-27
  29. Catterall WA, Morrow CA, Daly JW, Brown GB: Binding of batrachotoxinin A 20- $\alpha$ -benzoate to a receptor site associated with sodium channels in synaptic nerve ending particles. *J Biol Chem* 1981; 256:8922-7
  30. Edwards RA, Trainer VL, Baden DG: Brevetoxins bind to multiple classes of sites in rat brain synaptosomes. *Mol Brain Res* 1992; 14:64-70
  31. Poli MA, Mende TJ, Baden DG: Brevetoxins, unique activators of voltage-sensitive sodium channels, bind to specific sites in rat brain synaptosomes. *Mol Pharmacol* 1986; 30:129-35
  32. Catterall WA, Morrow CS, Hartshorne RP: Neurotoxin binding to receptor sites associated with voltage-sensitive sodium channels in intact, lysed, and detergent solubilized brain membranes. *J Biol Chem* 1979; 254:11379-87
  33. Hill RJ, Duff HJ, Sheldon RS: Class I antiarrhythmic drug receptor: Biochemical evidence for state-dependent interaction with quinidine and lidocaine. *Mol Pharmacol* 1989; 36:150-9
  34. Nicholls DG, Sihra TS, Sanchez-Prieto J: Calcium-dependent and -independent release of glutamate from synaptosomes monitored by continuous fluorometry. *J Neurochem* 1987; 49:50-7
  35. Miller MS, Gandolfi AJ: A rapid and sensitive method for quantifying enflurane in whole blood. *ANESTHESIOLOGY* 1979; 51:542-4
  36. Grima M, Schwartz J, Spach MO, Velly J: Anti-anginal arylalkylamines and sodium channels:  $[\text{H}^3]$ -Batrachotoxinin-A 20- $\alpha$ -benzoate and  $[\text{H}^3]$ -tetracaine binding. *Br J Pharmacol* 1986; 89:641-6
  37. Levitt JD: The effects of halothane and enflurane on rat brain synaptosomal sodium-potassium-activated triphosphatase. *ANESTHESIOLOGY* 1975; 42:267-74
  38. Catterall WA: Common modes of drug action in  $\text{Na}^+$  channels: Local anesthetics, antiarrhythmics and anticonvulsants. *Trends Pharmacol Sci* 1987; 8:57-65
  39. Taheri S, Halsey MJ, Liu J, Eger EI II, Koblin DD, Laster MJ: What solvent best represents the site of action of inhaled anesthetics in humans, rats and dogs? *Anesth Analg* 1991; 72:627-34
  40. Smith RA, Porter EG, Miller KW: The solubility of anesthetic gases in lipid bilayers. *Biochim Biophys Acta* 1981; 645:327-38
  41. Willow M, Catterall WA: Inhibition of binding of  $[\text{H}^3]$ batrachotoxinin-A 20- $\alpha$ -benzoate to sodium channels by the anticonvulsant drugs diphenylhydantoin and carbamazepine. *Mol Pharmacol* 1982; 22:627-35
  42. Harris RA, Jones SB, Bruno P, Bylund DB: Effects of dihydropyridine derivatives and anticonvulsant drugs on  $[\text{H}^3]$ nitrendipine binding and calcium and sodium fluxes in brain. *Biochem Pharmacol* 1985; 34:2187-91
  43. Garber SS, Miller C: Single  $\text{Na}^+$  channels activated by veratridine and batrachotoxin. *J Gen Physiol* 1987; 89:459-80
  44. Cannon SC, Brown RH Jr, Corey DP: Theoretical reconstruction of myotonia and paralysis caused by incomplete inactivation of sodium channels. *Biophys J* 1993; 65:270-88
  45. Jacques Y, Frelin C, Vigne P, Romey G, Parjari M, Lazdunski M: Neurotoxins specific for the sodium channel stimulate calcium entry into neuroblastoma cells. *Biochemistry* 1981; 20:6219-25
  46. McMahon HT, Nicholls DG: The bioenergetics of neurotransmitter release. *Biochim Biophys Acta* 1991; 1059:243-64



47. Nicol B, Rowbotham DJ, Lambert DG: Glutamate uptake is not a major target site for anaesthetic agents. *Br J Anaesth* 1995; 75:61-51
48. Miyazaki H, Nakamura Y, Arai T, Kataoka K: Increase of glutamate uptake in astrocytes: A possible mechanism of action of volatile anesthetics. *ANESTHESIOLOGY* 1997; 86:1359-66
49. Franks NP, Lieb WR: Molecular and cellular mechanisms of general anaesthesia. *Nature* 1994; 367:607-14
50. Jones MV, Brooks PA, Harrison NL: Enhancement of  $\gamma$ -aminobutyric acid-activated  $\text{Cl}^-$ -currents in cultured rat hippocampal neurones by three volatile anaesthetics. *J Physiol* 1992; 449:279-93
51. Moody EJ, Suzdak PD, Paul SM, Skolnick P: Modulation of the benzodiazepine/ $\gamma$ -aminobutyric acid receptor chloride channel complex by inhalation anesthetics. *J Neurochem* 1988; 51:1386-93
52. Taylor CP, Narasimhan LS: Sodium channels and therapy of central nervous system diseases. *Adv Pharmacol* 1997; 39:47-98
53. Hemmings HC Jr: Neuroprotection by sodium channel blockade and inhibition of glutamate release, *Neuroprotection*. Edited by Blanck TJJ. Baltimore, Williams and Wilkins, 1997, pp 23-46
54. Urenjak J, Obrenovitch TP: Pharmacological modulation of voltage-gated  $\text{Na}^+$  channels: A rational and effective strategy against ischemic brain damage. *Pharmacol Rev* 1996; 48:21-67
55. Bickler PE, Buck LT, Feiner JR: Volatile and intravenous anesthetics decrease glutamate release from cortical brain slices during anoxia. *ANESTHESIOLOGY* 1995; 83:1233-40
